# Supplementary material for: Interventions supporting long term adherence and decreasing cardiovascular events after myocardial infarction (ISLAND): pragmatic randomised controlled trial
Source: PubMed Central journal article supplement — BMJ. 2020 Jun 10;369:m1731. doi: 10.1136/bmj.m1731 (PMC7284284; doi:10.1136/bmj.m1731), 2020-06-10
Supplement: iven052681.ww.pdf [file iven052681.ww.pdf]

# Supplementary material - eFigure 1

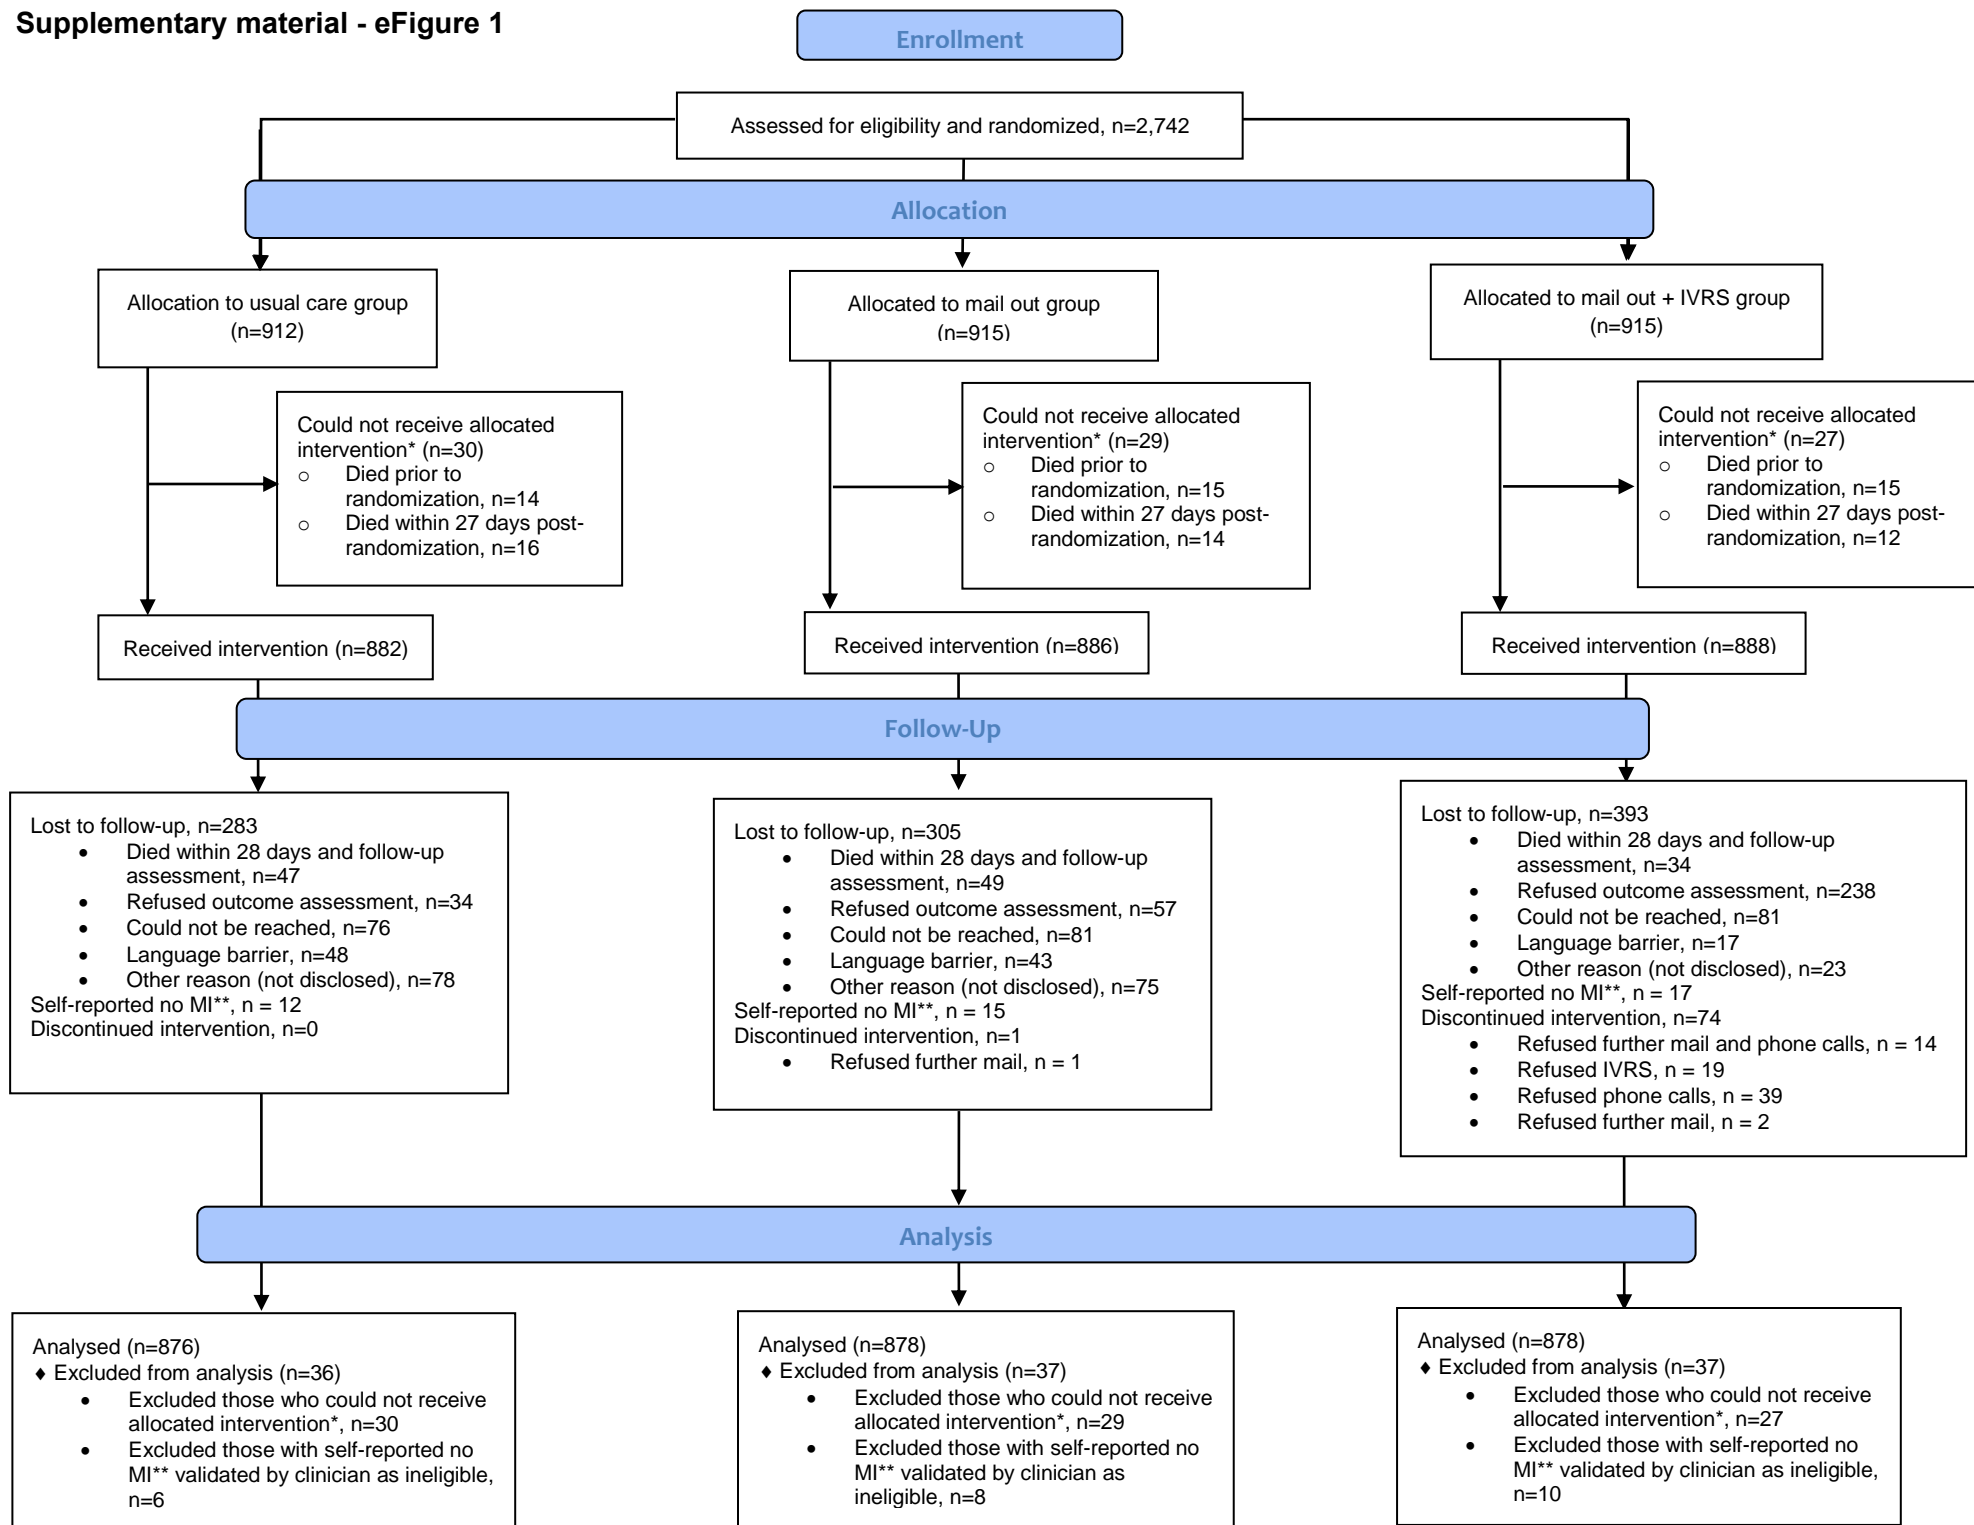

Supplementary material

eFigure 1. CONSORT diagram.

eFigure 2. Probability of survival over 12-month follow-up by treatment group among 2,624 post-myocardial infarction patients. *Note:* No patients were censored as administrative claims data was used to assess whether patients died during follow-up. 8 patients could not be linked to administrative claims data and were excluded from initial sample of 2,632 patients. X-axis starts at 27 days as only patients who survived through the first 27 days post-randomization were eligible for analysis.

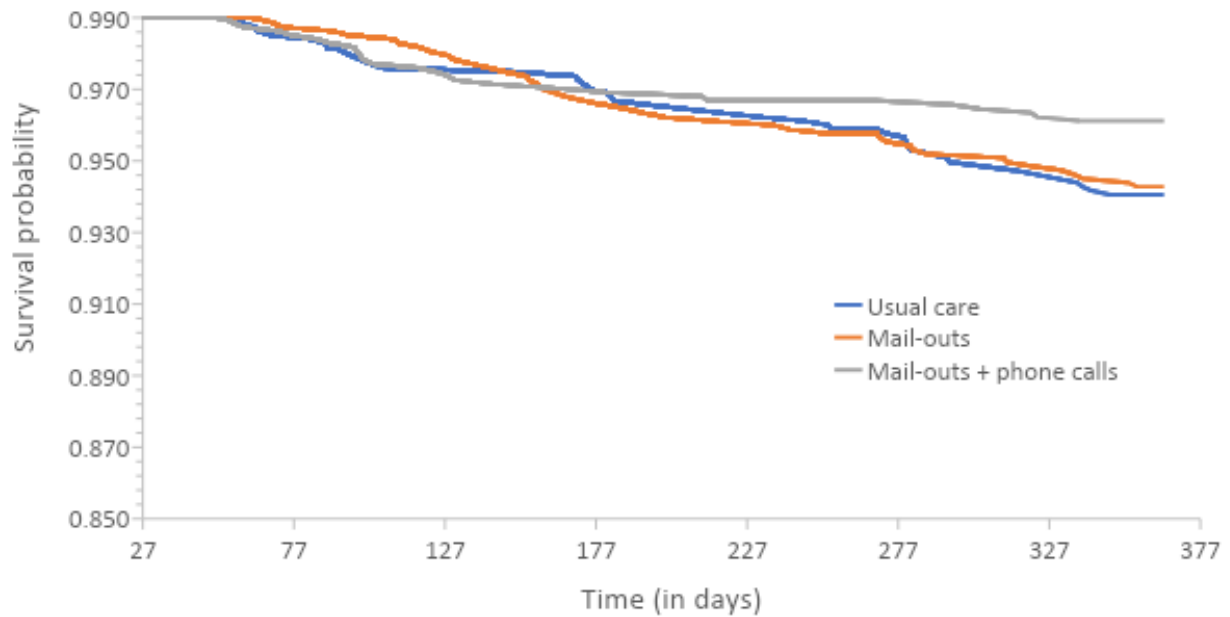

|                         |     |     |     |     |     |     |     |     |     |     |     |     |     |     |
|-------------------------|-----|-----|-----|-----|-----|-----|-----|-----|-----|-----|-----|-----|-----|-----|
| Usual care              | 875 | 869 | 863 | 857 | 856 | 854 | 847 | 846 | 843 | 840 | 834 | 832 | 827 | 823 |
| Mail-outs               | 874 | 869 | 864 | 862 | 856 | 851 | 844 | 842 | 841 | 838 | 833 | 831 | 827 | 824 |
| Mail-outs + phone calls | 875 | 870 | 863 | 856 | 852 | 851 | 849 | 849 | 847 | 847 | 846 | 845 | 842 | 840 |

Numbers at risk

## STATISTICAL APPENDIX

### Multiple imputation

Multiple imputation consists of three phases: 1) imputation; 2) analysis; and 3) pooling.

To complete the first phase, the PROC MI procedure in SAS Version 9.4 was used to specify imputation models for each variable with missing data. Fully conditional specification (FCS) was the method chosen for imputation, as it allows specification of different conditional distributions for each imputed variable. Additionally, FCS is preferred when there are many continuous and categorical variables with missing observations. We imputed 20 data sets as the percentage of incomplete cases<sup>1,2</sup> for both primary outcomes was approximately 20%.

In running the imputation procedure (via PROC MI), the order of variables in the VAR statement was decided by the % missingness in the raw data (arranged from lowest to highest). The frequency of missing responses can be found between **Table 1** (baseline characteristics) and **Supplemental Table 2** (outcomes). Variables were eligible for the imputation model if they met *at least* one of the following criteria: 1) present in any analytic model specified a priori (includes dependent and independent variables, as well as any interaction terms in planned subgroup analyses), and/or 2) auxiliary variable (correlated with imputed variable and/or associated with missingness for imputed variable). The inclusion of auxiliary variables helps to strengthen the plausibility of the missing at random (MAR) assumption underlying multiple imputation, i.e. the probability of an observation being missing for a given variable is dependent on the observed value(s) of other variable(s) within the data set. Furthermore, any variables explicitly mentioned as auxiliary variables in the protocol were included as such without formal testing. Predictive mean matching was used, rather than linear regression, to impute continuous variables as the former method does not assume normality. It is worth noting that several outcomes – medication adherence (ordinal), medication persistence (binary), and cardiac rehabilitation attendance (percentage completed, continuous) – were not directly imputed. Instead, the component variables in the original data set that were used to define these composite outcomes were imputed. Following imputation, these outcomes were defined and calculated using the completed (observed and imputed) data.

Following multiple imputation, we then analyzed each outcome (as detailed in the statistical analysis section) per imputed data set. For example, cardiac rehabilitation completion (a dichotomous outcome) was analyzed via logistic regression, with one model independently fit to each of the 20 imputed data sets. Estimated coefficients and standard errors obtained from each independent regression model were then pooled using Rubin's rules (via PROC MIANALYZE in SAS) to obtain the final treatment effect estimates (and corresponding 95% CI) presented throughout the paper.

Imputation diagnostics are presented in the following outputs: a) **Supplemental Table 2**, which compares the descriptive statistics for outcomes between participants with an observed response and all participants (observed plus imputed responses from one randomly selected imputed data set); b) **Supplemental Table 5**, which illustrates the implications of different assumptions about missingness on differences in cardiac rehabilitation completion and c) **Supplemental Table 6**, which compares the regression results for both the complete case and imputation analyses for both co-primary outcomes.

SAS Code available upon request.

1. Bodner TE. What improves with increased missing data imputations? *Structural Equation Modeling: A Multidisciplinary Journal*. 2008;15(4):651-675.
2. Graham JW, Olchowski AE, Gilreath TD. How many imputations are really needed? Some practical clarifications of multiple imputation theory. *Prevention science*. 2007;8(3):206-213.

**Supplemental Table 1.** Distribution of baseline characteristics based on refusal to complete an ISLAND outcome assessment at 12 months among those still alive at 12 months, N=2,502 patients.

| Characteristic                                        | Outcome assessment at 12 months |                              | P-value |
|-------------------------------------------------------|---------------------------------|------------------------------|---------|
|                                                       | Refused<br>(n = 319)            | Did not refuse<br>(n = 2183) |         |
| Treatment group, n (%)                                |                                 |                              | <.001*  |
| Usual care                                            | 34 (10.7)                       | 795 (36.4)                   |         |
| Mail-outs                                             | 54 (16.9)                       | 775 (35.5)                   |         |
| Mail-outs plus phone calls                            | 231 (72.4)                      | 613 (28.1)                   |         |
| Centre, n (%)                                         |                                 |                              | .11     |
| A                                                     | 60 (18.8)                       | 443 (20.3)                   |         |
| B                                                     | 19 (6.0)                        | 156 (7.2)                    |         |
| C                                                     | 45 (14.1)                       | 322 (14.8)                   |         |
| D                                                     | 24 (7.5)                        | 187 (8.6)                    |         |
| E                                                     | 21 (6.6)                        | 182 (8.3)                    |         |
| F                                                     | 46 (14.4)                       | 283 (13.0)                   |         |
| G                                                     | 14 (4.4)                        | 145 (6.6)                    |         |
| H                                                     | 23 (7.2)                        | 150 (6.9)                    |         |
| I                                                     | 67 (21.0)                       | 315 (14.4)                   |         |
| Age, mean ± SD                                        | 68.2 (12.4)                     | 65.1 (12.2)                  | <.001*  |
| ODB coverage due to age ≥ 65 y, n (%)                 |                                 |                              | <.001*  |
| No                                                    | 122 (38.2)                      | 1082 (49.6)                  |         |
| Yes                                                   | 197 (61.8)                      | 1101 (50.4)                  |         |
| Sex, n (%)                                            |                                 |                              | .17     |
| Male                                                  | 218 (68.3)                      | 1572 (72.0)                  |         |
| Female                                                | 101 (31.7)                      | 611 (28.0)                   |         |
| Rurality, n (%)                                       |                                 |                              | .96     |
| Rural                                                 | 52 (16.3)                       | 351 (16.2)                   |         |
| Urban                                                 | 267 (83.7)                      | 1818 (83.8)                  |         |
| Missing                                               | 0                               | 14                           |         |
| Neighbourhood income quintile <sup>a</sup> , n (%)    |                                 |                              | .06     |
| 1 (lowest)                                            | 81 (25.4)                       | 462 (21.3)                   |         |
| 2                                                     | 75 (23.5)                       | 461 (21.3)                   |         |
| 3                                                     | 64 (20.1)                       | 413 (19.0)                   |         |
| 4                                                     | 59 (18.5)                       | 430 (19.8)                   |         |
| 5 (highest)                                           | 40 (12.5)                       | 403 (18.6)                   |         |
| Missing                                               | 0                               | 14                           |         |
| Prior cardiac event or procedure <sup>b</sup> , n (%) |                                 |                              | <.001*  |
| No                                                    | 167 (53.9)                      | 1356 (64.4)                  |         |
| Yes                                                   | 143 (46.1)                      | 750 (35.6)                   |         |
| Missing                                               | 9                               | 77                           |         |
| History of smoking, n (%)                             |                                 |                              | .93     |
| Never                                                 | 121 (42.8)                      | 814 (42.1)                   |         |
| Current                                               | 79 (27.9)                       | 533 (27.5)                   |         |

|                                    |                      |            |             |       |
|------------------------------------|----------------------|------------|-------------|-------|
|                                    | Former               | 83 (29.3)  | 589 (30.4)  |       |
|                                    | Missing              | 36         | 247         |       |
| Diabetes, n (%)                    |                      |            |             | .005* |
|                                    | No                   | 199 (62.8) | 1522 (70.6) |       |
|                                    | Yes                  | 118 (37.2) | 635 (29.4)  |       |
|                                    | Missing              | 2          | 26          |       |
| Treatment at index catheterization |                      |            |             | .002* |
|                                    | Surgery + medication | 4 (1.3)    | 62 (2.8)    |       |
|                                    | Stent + medication   | 185 (58.0) | 1381 (63.3) |       |
|                                    | Medication only      | 130 (40.8) | 740 (33.9)  |       |

*Notes:* \*Statistically significant difference at  $P$ -value  $\leq .05$  (missing values excluded from tests of statistical significance and column percentage calculations). SD = standard deviation; ODB = Ontario Drug Benefit Plan. Column percentages are reported. Due to rounding, the sum of column percentages may exceed 100%. The listed variables (identical to **Table 1**) represent a subset of those collected by the investigators from the CorHealth registry, which were adjusted for in at least one multiple imputation model (see **Statistical Appendix**).

<sup>a</sup> Derived based on participant's postal code using a macro created by Statistics Canada.

<sup>b</sup> Indicator representing whether patient had history of prior myocardial infarction, coronary vascular disease, or coronary revascularization (percutaneous coronary intervention or coronary artery bypass graft) procedure.

<sup>c</sup> Surgery defined as either bypass surgery or balloon angioplasty.

**Supplemental Table 2.** Patient-reported primary and secondary outcomes at 12-month follow-up by group prior to multiple imputation among participating post-coronary acute syndrome patients.

| Outcomes                                                                                    | Prior to imputation |            |                         | Post-imputation <sup>a</sup> |            |                         |
|---------------------------------------------------------------------------------------------|---------------------|------------|-------------------------|------------------------------|------------|-------------------------|
|                                                                                             | Treatment group     |            |                         | Treatment group              |            |                         |
|                                                                                             | Usual care          | Mail-outs  | Mail-outs + Phone calls | Usual care                   | Mail-outs  | Mail-outs + Phone calls |
| <b>Primary outcomes, N=2,632</b>                                                            |                     |            |                         |                              |            |                         |
| No. participants                                                                            | 876                 | 876        | 878                     | 876                          | 876        | 878                     |
| <b>Cardiac rehabilitation completion, n (%)</b>                                             |                     |            |                         |                              |            |                         |
| Yes                                                                                         | 174 (27.1)          | 200 (31.8) | 196 (36.9)              | 234 (26.7)                   | 271 (30.9) | 342 (38.9)              |
| No                                                                                          | 469 (72.9)          | 428 (68.2) | 335 (63.1)              | 642 (73.3)                   | 607 (69.1) | 536 (61.1)              |
| Missing                                                                                     | 233                 | 250        | 347                     | 0                            | 0          | 0                       |
| <b>Medication adherence (No. of drug classes with no days missed in last 7 days), n (%)</b> |                     |            |                         |                              |            |                         |
| 0                                                                                           | 70 (12.2)           | 68 (12.5)  | 57 (11.7)               | 99 (11.3)                    | 90 (10.3)  | 86 (9.8)                |
| 1                                                                                           | 48 (8.4)            | 37 (6.8)   | 29 (6.0)                | 118 (13.5)                   | 106 (12.1) | 110 (12.5)              |
| 2                                                                                           | 75 (13.1)           | 74 (13.6)  | 70 (14.4)               | 162 (18.5)                   | 181 (20.6) | 166 (18.9)              |
| 3                                                                                           | 174 (30.3)          | 164 (30.2) | 160 (32.9)              | 242 (27.6)                   | 257 (29.3) | 296 (33.7)              |
| 4                                                                                           | 207 (36.1)          | 200 (36.8) | 170 (35.0)              | 255 (29.1)                   | 244 (27.8) | 220 (25.1)              |
| Missing                                                                                     | 302                 | 335        | 392                     | 0                            | 0          | 0                       |
| <b>Secondary outcomes, N=2,502</b>                                                          |                     |            |                         |                              |            |                         |
| No. participants <sup>b</sup>                                                               | 829                 | 829        | 844                     | 829                          | 829        | 844                     |
| <b>Cardiac rehabilitation enrollment, n(%)</b>                                              |                     |            |                         |                              |            |                         |
| Yes                                                                                         | 290 (48.7)          | 322 (55.6) | 308 (61.9)              | 377 (45.6)                   | 422 (50.9) | 483 (57.2)              |
| No                                                                                          | 306 (51.3)          | 257 (44.4) | 190 (38.2)              | 452 (54.5)                   | 407 (49.1) | 361 (42.8)              |
| Missing                                                                                     | 233                 | 250        | 346                     | 0                            | 0          | 0                       |
| <b>Cardiac rehabilitation completion (%), mean (SD)</b>                                     |                     |            |                         |                              |            |                         |
| Missing, n                                                                                  | 255                 | 274        | 408                     | 0                            | 0          | 0                       |
| <b>Medication adherence to all four classes (last 7 days), n(%)</b>                         |                     |            |                         |                              |            |                         |
| Yes                                                                                         | 207 (39.3)          | 200 (40.5) | 170 (37.6)              | 255 (30.8)                   | 244 (29.4) | 220 (26.1)              |
| No                                                                                          | 320 (60.7)          | 294 (59.5) | 282 (62.4)              | 574 (69.2)                   | 585 (70.6) | 624 (73.9)              |
| Missing                                                                                     | 302                 | 335        | 392                     | 0                            | 0          | 0                       |
| <b>Statin adherence (last 7 d), n(%)</b>                                                    |                     |            |                         |                              |            |                         |
| Yes                                                                                         | 410 (76.5)          | 395 (78.4) | 350 (75.9)              | 575 (69.4)                   | 599 (72.3) | 588 (69.7)              |
| No                                                                                          | 126 (23.5)          | 109 (21.6) | 111 (24.1)              | 254 (30.6)                   | 230 (27.7) | 256 (30.3)              |
| Missing                                                                                     | 293                 | 325        | 383                     | 0                            | 0          | 0                       |
| <b>Beta-blocker adherence (last 7 d), n(%)</b>                                              |                     |            |                         |                              |            |                         |
| Yes                                                                                         | 346 (64.7)          | 329 (65.4) | 298 (64.5)              | 501 (60.4)                   | 496 (59.8) | 503 (59.6)              |
| No                                                                                          | 189 (35.3)          | 174 (34.6) | 164 (35.5)              | 328 (39.6)                   | 333 (40.2) | 341 (40.4)              |
| Missing                                                                                     | 294                 | 326        | 382                     | 0                            | 0          | 0                       |
| <b>Antiplatelet adherence (last 7 d), n(%)</b>                                              |                     |            |                         |                              |            |                         |
| Yes                                                                                         | 471 (88.2)          | 437 (87.6) | 398 (86.5)              | 628 (75.8)                   | 590 (71.2) | 585 (69.3)              |
| No                                                                                          | 63 (11.8)           | 62 (12.4)  | 62 (13.5)               | 201 (24.3)                   | 239 (28.8) | 259 (30.7)              |

|                                                                                   |            |             |             |             |             |             |             |
|-----------------------------------------------------------------------------------|------------|-------------|-------------|-------------|-------------|-------------|-------------|
|                                                                                   | Missing    | 295         | 330         | 384         | 0           | 0           | 0           |
| Angiotensin system inhibitor adherence (last 7 d), n(%)                           |            |             |             |             |             |             |             |
|                                                                                   | Yes        | 337 (62.8)  | 331 (65.7)  | 298 (64.9)  | 484 (58.4)  | 530 (63.9)  | 534 (63.3)  |
|                                                                                   | No         | 200 (37.2)  | 173 (34.3)  | 161 (35.1)  | 345 (41.6)  | 299 (36.1)  | 310 (36.7)  |
|                                                                                   | Missing    | 292         | 325         | 385         | 0           | 0           | 0           |
| Medication adherence (No. drug classes with <6 days missed in last 30 days), n(%) |            |             |             |             |             |             |             |
|                                                                                   | 0          | 11 (2.1)    | 11 (2.2)    | 5 (1.1)     | 66 (8.0)    | 80 (9.7)    | 84 (10.0)   |
|                                                                                   | 1          | 34 (6.5)    | 31 (6.3)    | 24 (5.3)    | 125 (15.1)  | 122 (14.7)  | 142 (16.8)  |
|                                                                                   | 2          | 72 (13.8)   | 65 (13.2)   | 63 (14.0)   | 163 (19.7)  | 166 (20.0)  | 175 (20.7)  |
|                                                                                   | 3          | 182 (34.8)  | 173 (35.0)  | 172 (38.2)  | 227 (27.4)  | 231 (27.9)  | 230 (27.3)  |
|                                                                                   | 4          | 224 (42.8)  | 214 (43.3)  | 186 (41.3)  | 248 (29.9)  | 230 (27.7)  | 213 (25.2)  |
|                                                                                   | Missing    | 306         | 335         | 394         | 0           | 0           | 0           |
| Quality of life <sup>c</sup> , mean (SD)                                          |            | 86.8 (13.3) | 87.2 (12.8) | 86.1 (13.5) | 86.9 (13.6) | 86.7 (13.0) | 85.7 (13.8) |
|                                                                                   | Missing    | 260         | 280         | 369         | 0           | 0           | 0           |
| Smoking status, n (%)                                                             |            |             |             |             |             |             |             |
|                                                                                   | Smoker     | 75 (12.8)   | 67 (11.8)   | 52 (10.6)   | 126 (15.2)  | 134 (16.2)  | 131 (15.5)  |
|                                                                                   | Non-smoker | 513 (87.2)  | 500 (88.2)  | 437 (89.4)  | 703 (84.8)  | 695 (83.8)  | 713 (84.5)  |
|                                                                                   | Missing    | 241         | 262         | 355         | 0           | 0           | 0           |
| Medication persistence (all 4 classes), n (%)                                     |            |             |             |             |             |             |             |
|                                                                                   | Yes        | 230 (42.7)  | 220 (43.3)  | 194 (41.7)  | 326 (39.3)  | 322 (38.8)  | 315 (37.3)  |
|                                                                                   | No         | 309 (57.3)  | 288 (56.7)  | 271 (58.3)  | 503 (60.7)  | 507 (61.2)  | 529 (62.7)  |
|                                                                                   | Missing    | 290         | 321         | 379         | 0           | 0           | 0           |
| Statin persistence, n(%)                                                          |            |             |             |             |             |             |             |
|                                                                                   | Yes        | 441 (81.8)  | 421 (83.9)  | 383 (82.4)  | 655 (79.0)  | 650 (78.4)  | 658 (78.0)  |
|                                                                                   | No         | 98 (18.2)   | 87 (17.1)   | 82 (17.6)   | 174 (21.0)  | 179 (21.6)  | 186 (22.0)  |
|                                                                                   | Missing    | 290         | 321         | 379         | 0           | 0           | 0           |
| Beta-blocker persistence, n(%)                                                    |            |             |             |             |             |             |             |
|                                                                                   | Yes        | 373 (69.2)  | 353 (69.5)  | 333 (71.6)  | 564 (68.0)  | 569 (68.6)  | 594 (70.4)  |
|                                                                                   | No         | 166 (30.8)  | 155 (30.5)  | 132 (28.4)  | 265 (32.0)  | 260 (31.4)  | 250 (29.6)  |
|                                                                                   | Missing    | 290         | 321         | 379         | 0           | 0           | 0           |
| Antiplatelet persistence, n(%)                                                    |            |             |             |             |             |             |             |
|                                                                                   | Yes        | 501 (93.0)  | 461 (90.8)  | 424 (91.2)  | 767 (92.5)  | 749 (90.4)  | 775 (91.8)  |
|                                                                                   | No         | 38 (7.1)    | 47 (9.3)    | 41 (8.8)    | 62 (7.5)    | 80 (9.7)    | 69 (8.2)    |
|                                                                                   | Missing    | 290         | 321         | 379         | 0           | 0           | 0           |
| Angiotensin system inhibitor persistence, n(%)                                    |            |             |             |             |             |             |             |
|                                                                                   | Yes        | 360 (66.8)  | 348 (68.5)  | 324 (69.7)  | 521 (62.9)  | 542 (65.4)  | 567 (67.2)  |
|                                                                                   | No         | 179 (33.2)  | 160 (31.5)  | 141 (30.3)  | 308 (37.2)  | 287 (34.6)  | 277 (32.8)  |
|                                                                                   | Missing    | 290         | 321         | 379         | 0           | 0           | 0           |
| Dual-platelet adherence (last 7 d), n (%)                                         |            |             |             |             |             |             |             |
|                                                                                   | Yes        | 223 (41.8)  | 201 (40.2)  | 185 (40.3)  | 377 (45.5)  | 378 (45.6)  | 375 (44.4)  |
|                                                                                   | No         | 311 (58.2)  | 299 (59.8)  | 274 (59.7)  | 452 (54.5)  | 451 (54.4)  | 469 (55.6)  |

|                                            |                |                   |                   |                   |                   |                   |                   |
|--------------------------------------------|----------------|-------------------|-------------------|-------------------|-------------------|-------------------|-------------------|
|                                            | <b>Missing</b> | <b>295</b>        | <b>329</b>        | <b>385</b>        | <b>0</b>          | <b>0</b>          | <b>0</b>          |
| Dual-platelet adherence (last 30 d), n (%) |                |                   |                   |                   |                   |                   |                   |
|                                            | <b>Yes</b>     | <b>239 (45.1)</b> | <b>212 (42.2)</b> | <b>199 (43.4)</b> | <b>407 (49.1)</b> | <b>401 (48.4)</b> | <b>395 (46.8)</b> |
|                                            | <b>No</b>      | <b>291 (54.9)</b> | <b>289 (57.7)</b> | <b>260 (56.6)</b> | <b>422 (50.9)</b> | <b>428 (51.6)</b> | <b>449 (53.2)</b> |
|                                            | <b>Missing</b> | <b>299</b>        | <b>328</b>        | <b>385</b>        | <b>0</b>          | <b>0</b>          | <b>0</b>          |

*Notes:* Primary trial outcomes are **bolded**. SD = standard deviation; ODB = Ontario Drug Benefit Plan. Column percentages are reported excluding missing responses to facilitate comparison of distributions between the raw (observed) and imputed (observed and imputed) data sets. Due to rounding, the sum of column percentages may exceed 100%.

<sup>a</sup> Responses imputed using fully conditional specification multiple imputation. See **Statistical Appendix** for full details on procedure. The descriptive statistics are from one randomly selected data set of the 20 total imputed data sets.

<sup>b</sup> Excludes those who died between 28 and 365 days after randomization.

<sup>c</sup> Derived using the SAQ quality of life scale.



**Supplemental Table 3.** Estimates of intervention effects on medication adherence contingent on proportionality assumption.

| Model                                                                  | Intervention <sup>a</sup>  | OR (95% CI)                             |                     |                     |                     |
|------------------------------------------------------------------------|----------------------------|-----------------------------------------|---------------------|---------------------|---------------------|
|                                                                        |                            | Medication adherence (No. drug classes) |                     |                     |                     |
|                                                                        |                            | 4 v <4                                  | ≥3 v <3             | ≥2 v <2             | ≥1 v 0              |
| Fully proportional odds model <sup>b</sup><br>(primary analysis)       | Mail-outs                  | 0.98 (0.81 to 1.19)                     | 0.98 (0.81 to 1.19) | 0.98 (0.81 to 1.19) | 0.98 (0.81 to 1.19) |
|                                                                        | Mail-outs +<br>Phone calls | 0.99 (0.82 to 1.20)                     | 0.99 (0.82 to 1.20) | 0.99 (0.82 to 1.20) | 0.99 (0.82 to 1.20) |
| Partial proportional odds<br>model <sup>c</sup> (sensitivity analysis) | Mail-outs                  | 0.96 (0.76 to 1.22)                     | 0.98 (0.79 to 1.22) | 1.03 (0.78 to 1.36) | 1.02 (0.73 to 1.44) |
|                                                                        | Mail-outs +<br>Phone calls | 0.88 (0.69 to 1.13)                     | 1.02 (0.81 to 1.27) | 1.16 (0.86 to 1.58) | 1.15 (0.81 to 1.64) |

*Notes:* OR = odds ratio; CI = confidence interval. All OR values adjusted for fixed effect of centre (stratifying factor in randomization). Fully conditional specification was used to create 20 imputed data sets per outcome (i.e., multiple imputation). These multiple data sets were then analyzed independently using regression analysis. All OR and corresponding 95% CI presented in this table were obtained by pooling regression results across the imputed data sets using Rubin's rules (see **Statistical Appendix** for more details).

<sup>a</sup> Reference group = usual care.

<sup>b</sup> Assumes proportionality of effect across all four logit (4 v <4, ≥3 v <3, ≥2 v <2, ≥1 v 0).

<sup>c</sup> Does not assume proportionality of effect across all four logit.

**Supplemental Table 4.** Exploratory analysis results assessing whether intervention effects (on the log odds scale) differ across selected socio-demographic and clinical subgroups among 2,632 patients.

| Subgroup by intervention interaction |                            | Co-primary outcomes               |         |                                       |         |
|--------------------------------------|----------------------------|-----------------------------------|---------|---------------------------------------|---------|
|                                      |                            | Cardiac rehabilitation completion |         | Medication adherence (No. of classes) |         |
| Subgroup                             | Intervention               | Coefficient <sup>a</sup> (SE)     | P-value | Coefficient <sup>a</sup> (SE)         | P-value |
| Male                                 | Mail-outs                  | -0.13 (0.28)                      | .63     | 0.12 (0.21)                           | .58     |
| Male                                 | Mail-outs plus phone calls | 0.06 (0.27)                       | .81     | 0.36 (0.22)                           | .10     |
| Age≥65 y                             | Mail-outs                  | 0.23 (0.25)                       | .35     | 0.15 (0.20)                           | .45     |
| Age≥65 y                             | Mail-outs plus phone calls | 0.05 (0.26)                       | .85     | -0.04 (0.19)                          | .83     |
| Current smoker                       | Mail-outs                  | 0.11 (0.36)                       | .77     | 0.12 (0.26)                           | .65     |
| Current smoker                       | Mail-outs plus phone calls | 0.21 (0.36)                       | .57     | -0.09 (0.28)                          | .74     |
| Former smoker                        | Mail-outs                  | 0.43 (0.29)                       | .14     | 0.05 (0.24)                           | .84     |
| Former smoker                        | Mail-outs plus phone calls | 0.06 (0.30)                       | .84     | -0.10 (0.26)                          | .71     |
| Diabetes=yes                         | Mail-outs                  | 0.21 (0.27)                       | .44     | 0.05 (0.22)                           | .81     |
| Diabetes=yes                         | Mail-outs plus phone calls | 0.26 (0.31)                       | .41     | 0.43 (0.21)                           | .05     |
| Prior cardiac event or procedure=yes | Mail-outs                  | -0.07 (0.28)                      | .81     | -0.17 (0.22)                          | .44     |
| Prior cardiac event or procedure=yes | Mail-outs plus phone calls | 0.21 (0.28)                       | .46     | -0.08 (0.22)                          | .72     |
| Income quintile=2                    | Mail-outs                  | 0.00 (0.38)                       | .99     | 0.42 (0.32)                           | .19     |
| Income quintile=2                    | Mail-outs plus phone calls | -0.03 (0.41)                      | .94     | 0.60 (0.31)                           | .05     |
| Income quintile=3                    | Mail-outs                  | 0.50 (0.40)                       | .21     | -0.23 (0.32)                          | .47     |
| Income quintile=3                    | Mail-outs plus phone calls | 0.53 (0.45)                       | .24     | 0.10 (0.30)                           | .73     |
| Income quintile=4                    | Mail-outs                  | 0.14 (0.38)                       | .70     | 0.35 (0.33)                           | .28     |
| Income quintile=4                    | Mail-outs plus phone calls | -0.51 (0.41)                      | .21     | 0.24 (0.30)                           | .42     |
| Income quintile=5                    | Mail-outs                  | -0.38 (0.40)                      | .35     | -0.06 (0.30)                          | .83     |
| Income quintile=5                    | Mail-outs plus phone calls | -0.07 (0.38)                      | .85     | 0.03 (0.31)                           | .92     |
| Rural=yes                            | Mail-outs                  | 0.44 (0.31)                       | .15     | 0.14 (0.25)                           | .59     |
| Rural=yes                            | Mail-outs plus phone calls | -0.14 (0.34)                      | .67     | -0.24 (0.27)                          | .37     |

Notes: \*Statistically significant at  $P$ -value<.05. SE = standard error. Each row represents the results of a statistical interaction between subgroup and intervention added to the primary regression analysis for both co-primary outcomes (independently). Fully conditional specification was used to create 20 imputed data sets per outcome (i.e., multiple imputation). These multiple data sets were then analyzed independently using regression analysis. The interaction term coefficient estimates and standard errors presented were obtained by pooling regression results across the imputed data sets using Rubin's rules (see **Statistical Appendix** for more details). Binary logistic regression and ordinal logistic regression models used for cardiac rehabilitation completion and medication adherence outcomes respectively. Each coefficient estimate (for statistical interaction term) based on a regression model identical to primary regression analysis for that primary outcome, with addition of main effect for subgroup variable (e.g., male sex) and tested statistical interaction terms (e.g., male sex \* mail-outs; male sex \* mail-outs plus phone calls).

<sup>a</sup> For corresponding statistical interaction (i.e., cross-product) term. Coefficient reported on the log odds scale.

**Supplemental Table 5.** Sensitivity analysis to assess implications of different assumptions about missingness on differences in cardiac rehabilitation completion.

| <b>Complete cases (observed):</b> raw data taken from <b>Table 2</b> [used as reference for each single imputation scenario below].                                                                          |                 |             |                            |         |
|--------------------------------------------------------------------------------------------------------------------------------------------------------------------------------------------------------------|-----------------|-------------|----------------------------|---------|
| Cardiac rehabilitation completion                                                                                                                                                                            | Treatment group |             |                            | P-value |
|                                                                                                                                                                                                              | Usual care      | Mail-outs   | Mail-outs plus phone calls |         |
| Yes                                                                                                                                                                                                          | 174 (27.1%)     | 200 (31.8%) | 196 (36.9%)                | 0.002*  |
| No                                                                                                                                                                                                           | 469 (72.9%)     | 428 (68.2%) | 335 (63.1%)                |         |
| Missing                                                                                                                                                                                                      | 233             | 250         | 347                        |         |
| <b>Missing Completely At Random (MCAR):</b> All participants with missing values have the same likelihood of completing cardiac rehabilitation as complete cases (570/1802=31.6%).                           |                 |             |                            |         |
| Cardiac rehabilitation completion                                                                                                                                                                            | Treatment group |             |                            | P-value |
|                                                                                                                                                                                                              | Usual care      | Mail-outs   | Mail-outs plus phone calls |         |
| Yes                                                                                                                                                                                                          | 248 (28.3%)     | 279 (31.8%) | 306 (34.8%)                | 0.01*   |
| No                                                                                                                                                                                                           | 628 (71.7%)     | 599 (68.2%) | 572 (65.2%)                |         |
| <b>Missing At Random (MAR):</b> All participants with missing values have the same probability of completing cardiac rehabilitation as complete cases in their own treatment group.                          |                 |             |                            |         |
| Cardiac rehabilitation completion                                                                                                                                                                            | Treatment group |             |                            | P-value |
|                                                                                                                                                                                                              | Usual care      | Mail-outs   | Mail-outs plus phone calls |         |
| Yes                                                                                                                                                                                                          | 237 (27.1%)     | 280 (31.8%) | 324 (36.9%)                | <.001*  |
| No                                                                                                                                                                                                           | 639 (72.9%)     | 598 (68.2%) | 554 (63.1%)                |         |
| <b>Missing Not At Random (MNAR):</b> All participants with missing values in the two active treatment groups have the same probability of completing cardiac rehabilitation as the usual care control group. |                 |             |                            |         |
| Cardiac rehabilitation completion                                                                                                                                                                            | Treatment group |             |                            | P-value |
|                                                                                                                                                                                                              | Usual care      | Mail-outs   | Mail-outs plus phone calls |         |
| Yes                                                                                                                                                                                                          | 237 (27.1%)     | 268 (30.5%) | 290 (33.0%)                | .02*    |
| No                                                                                                                                                                                                           | 639 (72.9%)     | 610 (69.5%) | 588 (67.0%)                |         |
| <i>Note:</i> *Statistically significant at $P$ -value $\leq$ .05 using a simple chi-squared test for independence.                                                                                           |                 |             |                            |         |

**Supplemental Table 6.** Results of co-primary outcome regression analysis using multiple imputation versus complete case analysis.

| Outcome                                    | Intervention <sup>a</sup>            | FCS multiple imputation |                     |                              | Complete case analysis |                     |                              |
|--------------------------------------------|--------------------------------------|-------------------------|---------------------|------------------------------|------------------------|---------------------|------------------------------|
|                                            |                                      | N                       | OR (95% CI)         | <i>P</i> -value <sup>c</sup> | N                      | OR (95% CI)         | <i>P</i> -value <sup>c</sup> |
| Cardiac rehabilitation completion (yes/no) | Mail-outs                            | 2632                    | 1.19 (0.95 to 1.50) | .34                          | 1802                   | 1.26 (0.99 to 1.60) | .18                          |
|                                            | Mail-outs + phone calls              | 2632                    | 1.55 (1.18 to 2.03) | .007*                        | 1802                   | 1.59 (1.24 to 2.04) | <.001                        |
| Medication adherence (# drug classes, 0-4) | Mail-outs <sup>d</sup>               | 2632                    | 0.98 (0.81 to 1.19) | .98                          | 1603                   | 1.03 (0.83 to 1.27) | .96                          |
|                                            | Mail-outs + phone calls <sup>d</sup> | 2632                    | 0.99 (0.82 to 1.20) | .98                          | 1603                   | 1.02 (0.82 to 1.27) | .96                          |

*Notes:* OR = odds ratio; CI = confidence interval; FCS = fully conditional specification. Fully conditional specification was used to create 20 imputed data sets per outcome (i.e., multiple imputation). These multiple data sets were then analyzed independently using regression analysis. Odds ratios and 95% CI were obtained by pooling regression results across the imputed data sets using Rubin's rules (see **Statistical Appendix** for more details). Odds ratios obtained from binary logistic regression and ordinal logistic regression models used for cardiac rehabilitation. Odds ratios adjusted for fixed effect of centre (centre 1 = [reference] category). completion and medication adherence outcomes respectively.

<sup>a</sup> Reference group = usual care.

<sup>b</sup> Adjusted for multiple comparisons and multiple primary outcomes using step-down Šidák procedure.

<sup>c</sup> Assumes proportionality of effect across all four logit (4 v <4, ≥3 v <3, ≥2 v <2, ≥1 v 0).
